# Supplementary material
Source: PubMed Central journal article supplement (PMC3882471)
Supplement: mmc1.pdf [file mmc1.pdf]

## Supporting Material

### Two barriers or not? Dynamic force spectroscopy on the integrin $\alpha_7\beta_1$ invasin complex

Kristian Boye,<sup>†,||</sup> Agnieszka Ligezowska,<sup>†,‡,¶,||</sup> Johannes A. Eble,<sup>§</sup> Bernd Hoffmann,<sup>¶</sup> Beate Klösgen,<sup>†</sup> and Rudolf Merkel<sup>¶</sup> \*

<sup>†</sup> MEMPHYS – Center for Biomembrane Physics, Institute of Physics and Chemistry, University of Southern Denmark, DK-5230 Odense M, Denmark

<sup>‡</sup> Department of Physics, Jagiellonian University, 30-059 Cracow, Poland

<sup>§</sup> Center for Molecular Medicine, Vascular Matrix Biology, Excellence Cluster Cardio-Pulmonary System, Frankfurt University, D-60590 Frankfurt am Main, Germany

<sup>¶</sup> Institute of Complex Systems 7: Biomechanics, Forschungszentrum Jülich, D-52425 Jülich, Germany

<sup>||</sup> K. B. and A. L. contributed equally to this project.

\* Correspondence to: R. Merkel, Institute of Complex Systems 7: Biomechanics, Forschungszentrum Jülich, D-52425 Jülich, Germany, Fax 02461-61-3907, Phone 02461-61-4551, E-mail [r.merkel@fz-juelich.de](mailto:r.merkel@fz-juelich.de)

| Series id | $v_{piezo}$ [ $\mu\text{m/s}$ ] | $\frac{\bar{v}_{bjp}}{v_{piezo}}$ [%] | $f_{im}$ [pN] | $r_{16}$ [nN/s] | $r_{84}$ [nN/s] | $f_{16}^{\dagger}$ [pN] | $f_{84}^{\dagger}$ [pN] |     |
|-----------|---------------------------------|---------------------------------------|---------------|-----------------|-----------------|-------------------------|-------------------------|-----|
| 1         | 0.24                            | 96                                    | 6             | 0.017           | 0.018           | 8.9                     | 16                      |     |
| 2         | a                               | 0.72                                  | 90            | 6               | 0.021           | 0.026                   | 6.2                     | 9.4 |
|           | b                               | 0.36                                  | 92            | 6               | 0.022           | 0.027                   | 11                      | 13  |
| 3         | 0.72                            | 90                                    | 9             | 0.046           | 0.052           | 14                      | 16                      |     |
| 4         | a                               | 0.84                                  | 86            | 13              | 0.097           | 0.13                    | 17                      | 20  |
|           | b                               | 1.7                                   | 90            | 9               | 0.11            | 0.12                    | 14                      | 16  |
| 5         | a                               | 1.4                                   | 92            | 11              | 0.19            | 0.21                    | 22                      | 26  |
|           | b                               | 2.9                                   | 93            | 8               | 0.20            | 0.21                    | 21                      | 26  |
| 6         | a                               | 2.2                                   | 87            | 10              | 0.24            | 0.29                    | 24                      | 27  |
|           | b                               | 1.7                                   | 89            | 17              | 0.28            | 0.31                    | 28                      | 32  |
| 7         | 2.3                             | 90                                    | 14            | 0.37            | 0.43            | 37                      | 42                      |     |
| 8         | a                               | 1.8                                   | 83            | 22              | 0.46            | 0.57                    | 33                      | 41  |
|           | b                               | 4.1                                   | 90            | 16              | 0.50            | 0.62                    | 40                      | 47  |
| 9         | a                               | 2.8                                   | 85            | 31              | 0.72            | 0.90                    | 40                      | 46  |
|           | b                               | 5.0                                   | 85            | 18              | 0.74            | 0.89                    | 41                      | 50  |
| 10        | 7.8                             | 90                                    | 16            | 1.2             | 1.3             | 47                      | 62                      |     |
| 11        | 5.5                             | 83                                    | 32            | 1.4             | 1.7             | 50                      | 56                      |     |
| 12        | 7.2                             | 87                                    | 38            | 1.2             | 2.3             | 59                      | 64                      |     |
| 13        | 8.4                             | 82                                    | 44            | 3.0             | 3.6             | 62                      | 68                      |     |
| 14        | 10.8                            | 85                                    | 58            | 4.8             | 5.6             | 65                      | 75                      |     |

**Table S1: Statistical uncertainties and parameters relevant for filtering of measurements.** Series have been sorted according to increasing loading rate. Series labeled with identical numbers, but different characters, have almost the same force loading rates, but different spring constants. All parameters were calculated after a preprocessing routine that filters out events with abnormal pulling velocities. Abbreviations:  $v_{piezo}$  piezo velocity,  $\bar{v}_{bjp}$  average speed of probe bead, and  $f_{im}$  median impingement force,  $r_{16}$  16% fractile and  $r_{84}$  84% fractile of measured force loading rates,  $f_{16}^{\dagger}$  16% fractile and  $f_{84}^{\dagger}$  84% fractile of median yield forces as determined with 2500 bootstrap iterations (cf. Materials and Methods in the main text).
